# Supplementary material for: Detection of Relative Afferent Pupillary Defects Using Eye Tracking and a VR Headset
Source: PubMed Central journal article supplement (PMC10309159; doi:10.1167/tvst.12.6.22), 2023-06-27
Supplement: tvst-12-6-22_s001.pdf [file tvst-12-6-22_s001.pdf]

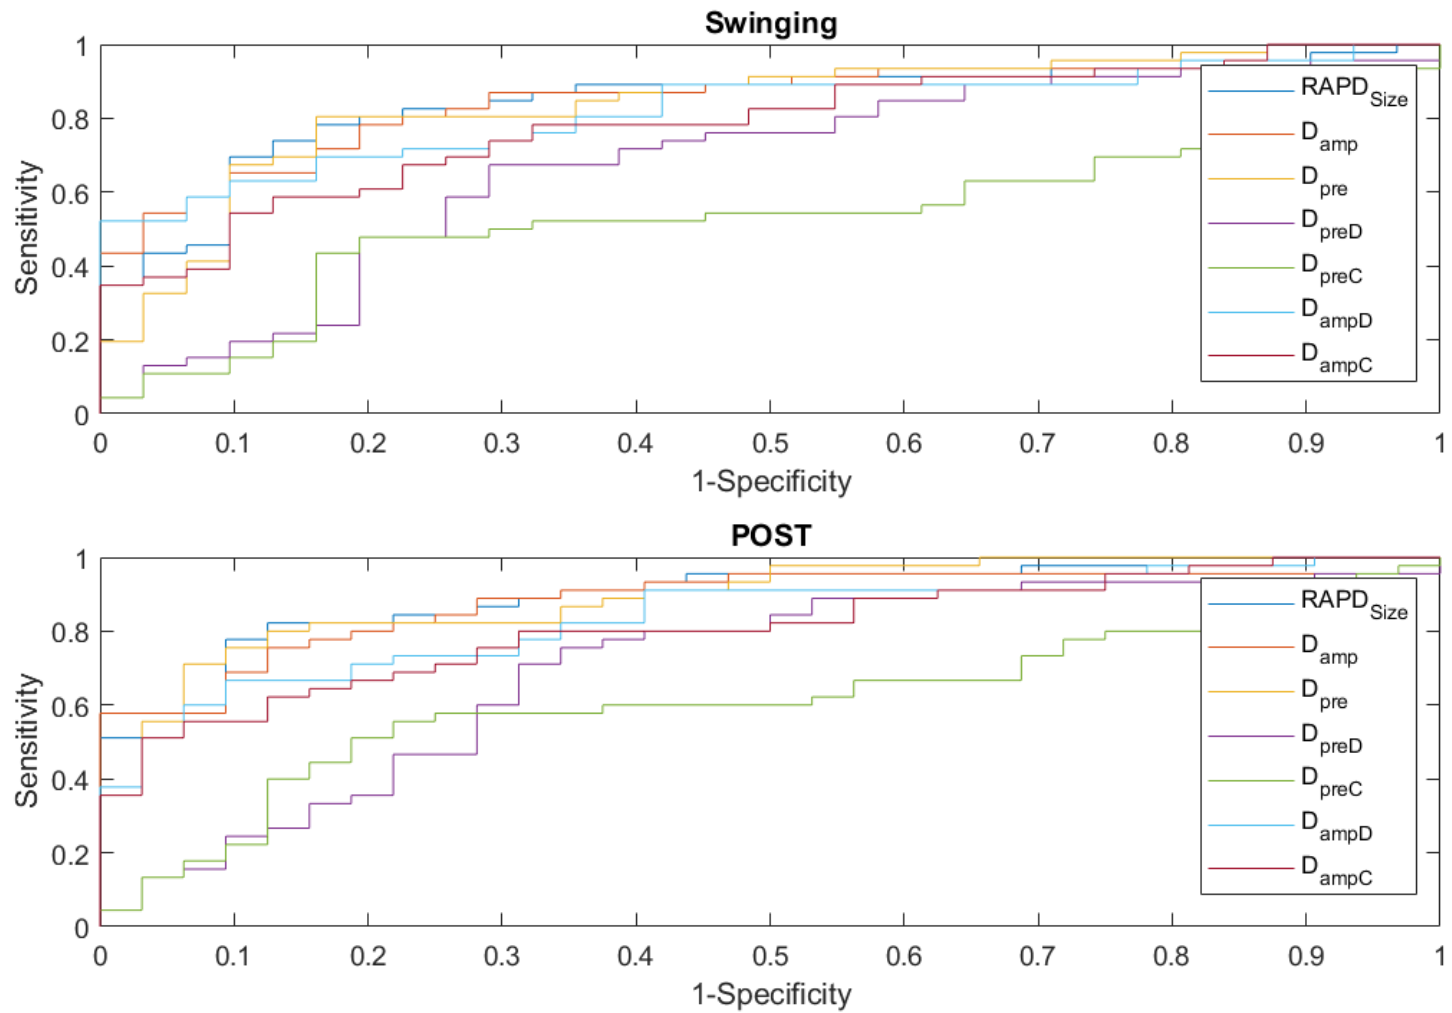

Supplementary Figure 1

Receiver operating characteristic (ROC) for different extracted features. ROC with the post-hoc impression used as reference. Description of the features: RAPD<sub>size</sub> binocular feature including prestimulus amplitude differences and contraction amplitude differences; D<sub>amp</sub> mean of the

right and left eye of the contraction amplitude difference;  $D_{pre}$  mean of the right and left eye prestimulus amplitude difference;  $D_{preD}$  amplitude difference measured on the illuminated eye;  $D_{preC}$  amplitude difference measured on the not illuminated eye;  $D_{ampD}$  contraction amplitude difference measured on the illuminated eye;  $D_{ampC}$  contraction amplitude difference measured on the not illuminated eye;
